# Supplementary material for: High-density insensitive energetic materials: 2,4,6-tris(2-fluoro-2,2-dinitroethoxy)-1,3,5-triazine
Source: Royal Society of Chemistry journal article supplement (doi:10.1039/c6ra24629j), 2016-01-01
Supplement: c6ra24629j1.pdf [file c6ra24629j1.pdf]

## Electronic Supporting Information

### High-Density Insensitive Energetic Materials: 2,4,6-Tris(2-fluoro-2,2-dinitroethoxy)-1,3,5-triazine

Alexander A. Gidaspov, Vladimir V. Bakharev, Kyrill Yu. Suponitsky, Valery G. Nikitin and Aleksei B. Sheremetev

Table 1S. Selected torsion angles (°) in compound 1 in comparison with those of three symmetrically independent molecules A, A', A'' of compound 5.

| Torsion angle     | fluorodinitroethoxy-triazine <b>5</b> |           | trinitroethoxy-triazine <b>5</b> |           |           |
|-------------------|---------------------------------------|-----------|----------------------------------|-----------|-----------|
|                   | A                                     | A'        | A                                | A'        | A''       |
| N1-C1-O1-C4       | 175.78(14)                            |           | 178.8(6)                         | -173.2(6) | -171.3(6) |
| C1-O1-C4-C5       | -174.02(14)                           |           | 129.9(6)                         | 117.5(7)  | 113.7(7)  |
| O1-C4-C5-N4       | 57.24(17)                             |           | 40.4(7)                          | 36.5(8)   | 41.6(8)   |
| O1-C4-C5-N5(F1)   | -64.36(17)                            |           | -80.2(7)                         | -83.2(7)  | -80.3(7)  |
| O1-C4-C5-N6       | 172.95(13)                            |           | 159.8(5)                         | 155.9(6)  | 161.3(6)  |
| C4-C5-N4-O2       | -136.77(15)                           |           | -131.3(7)                        | -127.4(7) | -121.1(7) |
| C4-C5-N5-O5       |                                       |           | -139.5(7)                        | -141.9(9) | -151.5(7) |
| C4-C5-N6-O6       | 146.92(15)                            |           | -141.6(7)                        | -142.2(7) | -140.6(7) |
| N2-C2-O8-C6       | -0.4(2)                               |           | 172.7(6)                         | 179.2(6)  | -179.8(6) |
| C2-O8-C6-C7       | 161.21(14)                            |           | 160.7(7)                         | 161.4(6)  | 162.7(6)  |
| O8-C6-C7-N7(F2)   | -178.02(13)                           |           | 46.8(9)                          | -50.0(7)  | -50.2(7)  |
| O8-C6-C7-N8       | 61.6(2)                               |           | -78.5(8)                         | 73.6(7)   | 70.6(7)   |
| O8-C6-C7-N9       | -58.34(18)                            |           | 166.1(6)                         | -167.2(5) | -168.5(5) |
| C6-C7-N7-O9       |                                       |           | -114.3(10)                       | 140.8(7)  | 143.7(7)  |
| C6-C7-N8-O12      | 12.0(2)                               |           | -127.1(8)                        | 137.6(7)  | 123.3(7)  |
| C6-C7-N9-O13      | 83.6(2)                               |           | -157.7(8)                        | 137.8(7)  | 144.5(7)  |
| N3-C3-O15-C8      | -170.52(15)                           |           | 176.3(6)                         | 179.7(6)  | 178.8(6)  |
| C3-O15-C8-C9      | -148.01(19)                           | -171.0(4) | -131.8(7)                        | -145.6(6) | -143.2(6) |
| O15-C8-C9-N10     | -53.2(3)                              | 52.4(7)   | -45.8(8)                         | -42.2(8)  | -42.6(8)  |
| O15-C8-C9-N11(F3) | 67.8(3)                               | -72.6(7)  | 77.0(8)                          | 80.5(7)   | 78.0(8)   |
| O15-C8-C9-N12     | -168.5(2)                             | 166.5(4)  | -162.4(8)                        | -162.9(7) | -161.3(7) |
| C8-C9-N10-O17     | 133.0(5)                              | 44.8(10)  | 137.1(8)                         | 130.0(7)  | 127.9(7)  |
| C8-C9-N11-O19     |                                       |           | 126.3(7)                         | 146.2(7)  | 145.3(7)  |
| C8-C9-N12-O20     | -141.4(2)                             | -118.6(4) | 133.4(7)                         | 130.6(7)  | 133.4(7)  |

**Table 2S.** Pair intermolecular interaction energies (kcal/mol) and shortened contacts (Å) of of compound **1** with its closest environment in the crystal obtained at M052X/aug-cc-pvdz level of approximation.<sup>a,b</sup>

| Entry       | Close contact |             | Distance     | Symmetry Code     | Energy | Type of Interaction                       |
|-------------|---------------|-------------|--------------|-------------------|--------|-------------------------------------------|
| 1           | O21           | C2          | 2.992        | 1+x,y,z           | -11.6  | Nitro...Nitro<br>O... $\pi$<br>F... $\pi$ |
|             | O16           | O3          | 2.898        | 1+x,y,z           |        |                                           |
|             | O16           | C1          | 2.955        | 1+x,y,z           |        |                                           |
|             | <b>F3'</b>    | <b>C1</b>   | <b>3.005</b> | 1+x,y,z           |        |                                           |
| 2           | O3            | O16         | 2.898        | -1+x,y,z          | -11.6  | Nitro...Nitro<br>O... $\pi$<br>F... $\pi$ |
|             | C1            | O16         | 2.955        | -1+x,y,z          |        |                                           |
|             | C2            | O21         | 2.992        | -1+x,y,z          |        |                                           |
|             | <b>C1</b>     | <b>F3'</b>  | <b>3.005</b> | <b>-1+x,y,z</b>   |        |                                           |
| 3           | O12           | O6          | 3.009        | 1+x,y,1+z         | -4.5   | Nitro...Nitro                             |
|             | O12           | N4          | 3.003        | 1+x,y,1+z         |        |                                           |
|             | O12           | N6          | 3.012        | 1+x,y,1+z         |        |                                           |
|             | N8            | O3          | 2.934        | 1+x,y,1+z         |        |                                           |
| 4           | O3            | N8          | 2.934        | -1+x,y,-1+z       | -4.5   | Nitro...Nitro                             |
|             | O6            | O12         | 3.009        | -1+x,y,-1+z       |        |                                           |
|             | N4            | O12         | 3.003        | -1+x,y,-1+z       |        |                                           |
|             | N6            | O12         | 3.012        | -1+x,y,-1+z       |        |                                           |
| 5           | O11           | O7          | 3.029        | x,y,1+z           | -1.9   | Nitro...Nitro                             |
| 6           | O7            | O11         | 3.029        | x,y,-1+z          | -1.9   | Nitro...Nitro                             |
| 7           | <b>F3</b>     | <b>O16'</b> | 2.928        | 1-x,1-y,1-z       | -5.6   | Nitro...Nitro<br>F...Nitro                |
|             | <b>O17</b>    | <b>O17'</b> | 2.957        | 1-x,1-y,1-z       |        |                                           |
|             | <b>O16'</b>   | <b>F3</b>   | 2.928        | 1-x,1-y,1-z       |        |                                           |
| 8           | O14           | H8B         | 2.428        | 1-x,1-y,2-z       | -8.2   | C-H...O                                   |
|             | H8B           | O14         | 2.428        | 1-x,1-y,2-z       |        |                                           |
|             | <b>O14</b>    | <b>H8D</b>  | 2.359        | 1-x,1-y,2-z       |        |                                           |
|             | <b>H8D</b>    | <b>O14</b>  | 2.359        | 1-x,1-y,2-z       |        |                                           |
| 9           | N12           | O17         | 3.018        | 2-x,1-y,1-z       | -3.0   | Nitro...Nitro<br>F...Nitro                |
|             | O17           | N12         | 3.018        | 2-x,1-y,1-z       |        |                                           |
|             | O17           | N10         | 2.913        | 2-x,1-y,1-z       |        |                                           |
|             | N10           | O17         | 2.913        | 2-x,1-y,1-z       |        |                                           |
|             | <b>O17</b>    | <b>F3'</b>  | 2.855        | 2-x,1-y,1-z       |        |                                           |
|             | <b>O16</b>    | <b>O16'</b> | 2.976        | 2-x,1-y,1-z       |        |                                           |
|             | <b>F3'</b>    | <b>O17</b>  | 2.855        | 2-x,1-y,1-z       |        |                                           |
| <b>O16'</b> | <b>O16</b>    | 2.976       | 2-x,1-y,1-z  |                   |        |                                           |
| 10          | F2            | O20         | 3.176        | 2-x,1-y,2-z       | -1.1   |                                           |
|             | O20           | F2          | 3.176        | 2-x,1-y,2-z       |        |                                           |
| 11          | F1            | O13         | 2.835        | x,1/2-y,-1/2+z    | -7.4   | F...Nitro<br>O... $\pi$                   |
|             | C1            | O12         | 2.957        | x,1/2-y,-1/2+z    |        |                                           |
| 12          | O12           | C1          | 2.957        | x,1/2-y,1/2+z     | -7.4   | F...Nitro<br>O... $\pi$                   |
|             | O13           | F1          | 2.835        | x,1/2-y,1/2+z     |        |                                           |
| 13          | O2            | O8          | 2.991        | -1+x,1/2-y,-1/2+z | -4.4   | Nitro...Nitro<br>O... $\pi$               |
|             | O2            | C2          | 2.921        | -1+x,1/2-y,-1/2+z |        |                                           |
|             | O6            | O15         | 2.851        | -1+x,1/2-y,-1/2+z |        |                                           |
|             | O6            | C3          | 2.926        | -1+x,1/2-y,-1/2+z |        |                                           |
| 14          | O8            | O2          | 2.991        | 1+x,1/2-y,1/2+z   | -4.4   | Nitro...Nitro<br>O... $\pi$               |
|             | O15           | O6          | 2.851        | 1+x,1/2-y,1/2+z   |        |                                           |
|             | C2            | O2          | 2.921        | 1+x,1/2-y,1/2+z   |        |                                           |
|             | C3            | O6          | 2.926        | 1+x,1/2-y,1/2+z   |        |                                           |

<sup>a</sup> Contacts given in bold correspond to interactions with minor part of the disordered fluorodinitroethoxy substituent

<sup>b</sup> Calculation was carried out by the Gaussian program [M. J. Frisch, G. W. Trucks, H. B. Schlegel, G. E. Scuseria, M. A. Robb, J. R. Cheeseman, J. A., Jr. Montgomery, K. N. Kudin, J. C. Burant, J. M. Millam, S. S. Iyengar, J. Tomasi, V. Barone, B. Mennucci, M. Cossi, G. Scalmani, N. Rega, G. A. Petersson, H. Nakatsuji, M. Hada, M. Ehara, K. Toyota, R. Fukuda, J. Hasegawa, M. Ishida, T. Nakajima, Y. Honda, O. Kitao, H. Nakai, M. Klene, X. Li, J. E. Knox, H. P. Hratchian, J. B. Cross, V. Bakken, C. Adamo, J. Jaramillo, R. Gomperts, R. E. Stratmann, O. Yazyev, A. J. Austin, R. Cammi, C. Pomelli, J. W. Ochterski, P. Y. Ayala, K. Morokuma, G. A. Voth, P. Salvador, J. J.

Dannenberg, V. G. Zakrzewski, S. Dapprich, A. D. Daniels, M. C. Strain, O. Farkas, D. K. Malick, A. D. Rabuck, K. Raghavachari, J. B. Foresman, J. V. Ortiz, Q. Cui, A. G. Baboul, S. Clifford, J. Cioslowski, B. B. Stefanov, G. Liu, A. Liashenko, P. Piskorz, I. Komaromi, R. L. Martin, D. J. Fox, T. Keith, M. A. Al-Laham, C. Y. Peng, A. Nanayakkara, M. Challacombe, P. M. W. Gill, B. Johnson, W. Chen, M. W. Wong, C. Gonzalez, J. A. Pople, *Gaussian 03, Revision E.01*; Gaussian, Inc.: Wallingford, CT (2004)]

**Table 3S.** Crystallographic data for low-temperature (100K) and room-temperature (298K) for compound **1**<sup>c, d</sup>

| Parameter                                                                             | <b>1</b> (100K)                                                             | <b>1</b> (298K)                                                             |
|---------------------------------------------------------------------------------------|-----------------------------------------------------------------------------|-----------------------------------------------------------------------------|
| Empirical formula                                                                     | C <sub>9</sub> H <sub>6</sub> F <sub>3</sub> N <sub>9</sub> O <sub>15</sub> | C <sub>9</sub> H <sub>6</sub> F <sub>3</sub> N <sub>9</sub> O <sub>15</sub> |
| Fw                                                                                    | 537.23                                                                      | 537.23                                                                      |
| Crystal system                                                                        | Monoclinic                                                                  | Monoclinic                                                                  |
| Space group                                                                           | <i>P2<sub>1</sub>/c</i>                                                     | <i>P2<sub>1</sub>/c</i>                                                     |
| <i>a</i> , Å                                                                          | 7.3284(6)                                                                   | 7.4308(4)                                                                   |
| <i>b</i> , Å                                                                          | 22.5119(17)                                                                 | 22.8382(12)                                                                 |
| <i>c</i> , Å                                                                          | 11.7209(9)                                                                  | 11.8801(6)                                                                  |
| $\beta$ , deg.                                                                        | 107.3420(10)                                                                | 107.5930(10)                                                                |
| <i>V</i> , Å <sup>3</sup>                                                             | 1845.8(2)                                                                   | 1921.83(17)                                                                 |
| <i>Z</i>                                                                              | 4                                                                           | 4                                                                           |
| <i>d</i> <sub>calc</sub> , g·cm <sup>-3</sup>                                         | 1.933                                                                       | 1.857                                                                       |
| $\mu$ , mm <sup>-1</sup>                                                              | 0.201                                                                       | 0.193                                                                       |
| F(000)                                                                                | 1080                                                                        | 1080                                                                        |
| $\theta$ range, deg.                                                                  | 1.81 – 30.00                                                                | 1.81 – 30.00                                                                |
| independent reflections                                                               | 5392                                                                        | 5601                                                                        |
| <i>R</i> <sub>int</sub>                                                               | 0.0683                                                                      | 0.0275                                                                      |
| reflections with <i>I</i> > 2 $\sigma$ ( <i>I</i> )                                   | 3520                                                                        | 3875                                                                        |
| Completeness to theta $\theta$ , %                                                    | 100                                                                         | 99.8                                                                        |
| <i>GOF</i> ( <i>F</i> <sup>2</sup> )                                                  | 1.007                                                                       | 1.036                                                                       |
| <i>R</i> <sub>1</sub> ( <i>F</i> ) ( <i>I</i> > 2 $\sigma$ ( <i>I</i> )) <sup>a</sup> | 0.0440                                                                      | 0.432                                                                       |
| <i>wR</i> <sub>2</sub> ( <i>F</i> <sup>2</sup> ) (all data) <sup>b</sup>              | 0.0956                                                                      | 0.1224                                                                      |
| Largest diff. peak/hole, e·Å <sup>-3</sup>                                            | 0.389 / -0.273                                                              | 0.275 / -0.265                                                              |
| <i>N</i> <sub>o</sub> CCDC                                                            | 1507749                                                                     | 1507750                                                                     |

$$^a R_1 = \sum |F_o - |F_c|| / \sum (F_o); \quad ^b wR_2 = (\sum [w(F_o^2 - F_c^2)^2] / \sum [w(F_o^2)^2])^{1/2}$$

<sup>c</sup> Difference in packing density upon going from 100 to 298K of compound **1** is 4.0%

<sup>d</sup> for data processing and crystal structure solution and refinement, the program packages APEX2 and SHELXTL were used [APEX2, Bruker AXS Inc., Madison, Wisconsin, USA, 2009; Sheldrick, G.M. *Acta Cryst*, 2008, A64, 112]
